# Supplementary material for: Genome-wide landscape of DNA methylomes and their relationship with mRNA and miRNA transcriptomes in oxidative and glycolytic skeletal muscles
Source: PubMed Central journal article supplement (PMC4999948; doi:10.1038/srep32186), 2016-08-26
Supplement: srep32186-s2.pdf [file srep32186-s2.pdf]

## Supplementary Information

Genome-wide landscape of DNA methylomes and their relationship with mRNA and miRNA transcriptome profiling between oxidative and glycolytic skeletal muscles

Linyuan Shen, Jinjin Du, Yudong Xia, Zhendong Tan, Yuhua Fu, Qiong Yang, Xuewei Li, Guoqing Tang, Yanzhi Jiang, Jinyong Wang, Mingzhou Li, Shunhua Zhang, & Li Zhu

### On-line Supplementary Data

#### Supplementary Figures:

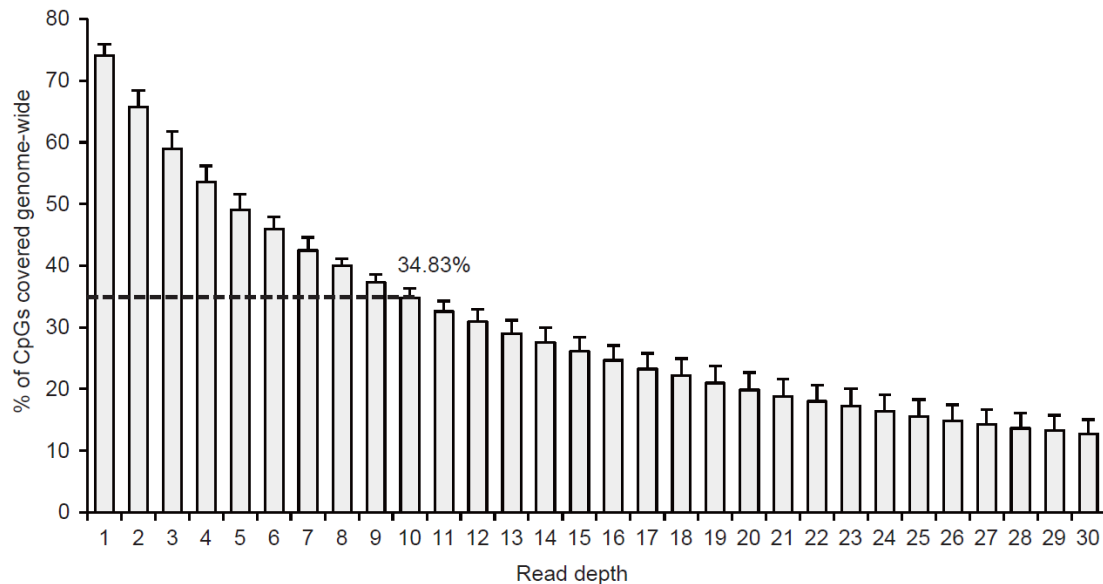

**Supplementary Figure S1. Percentage of CpGs sites showing an average coverage that meets the read depth threshold over all samples.** Values are the means  $\pm$  s.d. (n = 6).

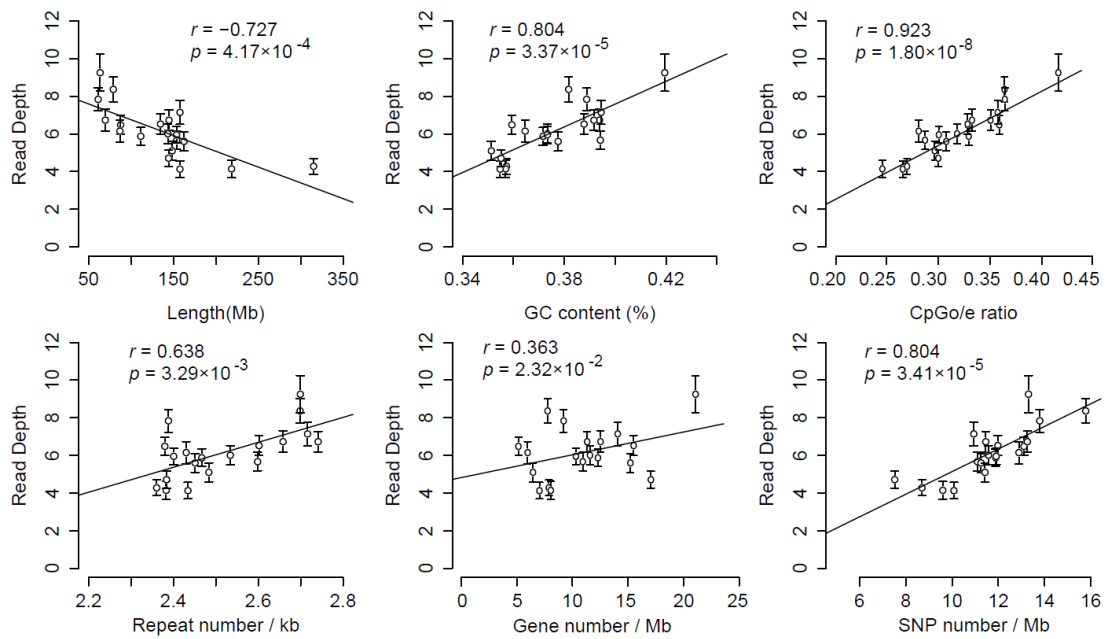

**Supplementary Figure S2. Pearson's correlation between DNA methylation level and chromosomal features.**

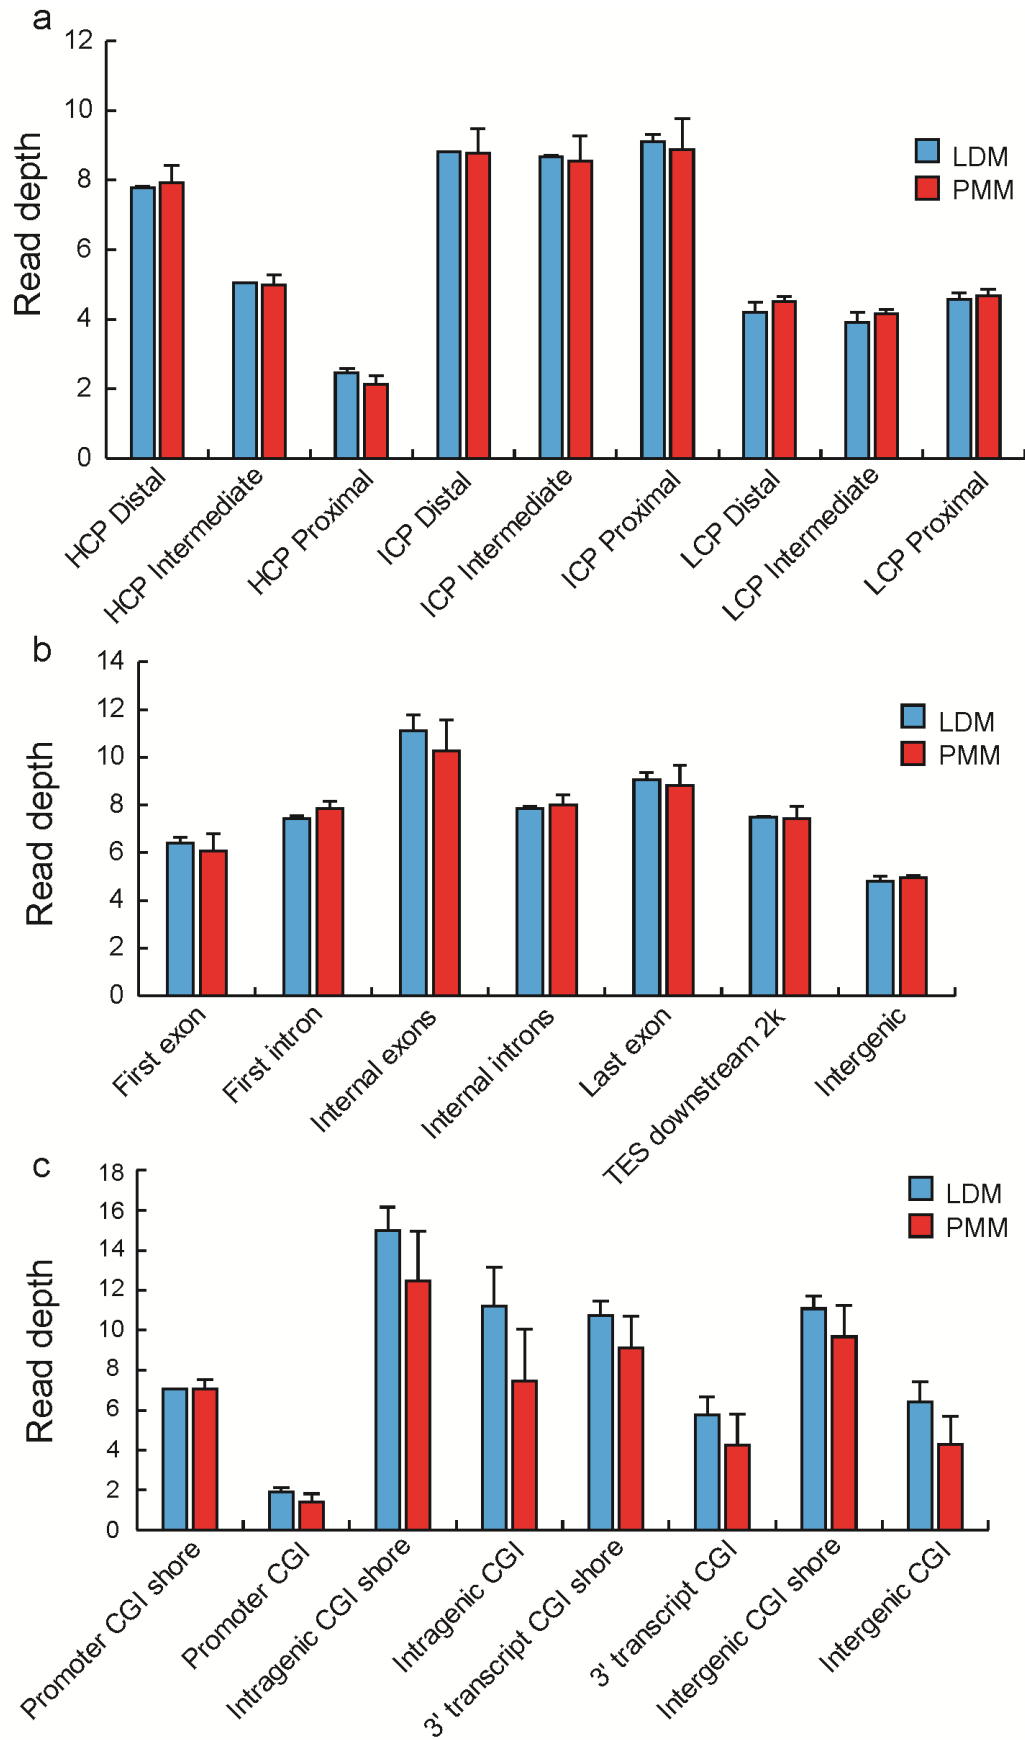

**Supplementary Figure S3. Comparison of methylation levels in various of genomic elements**

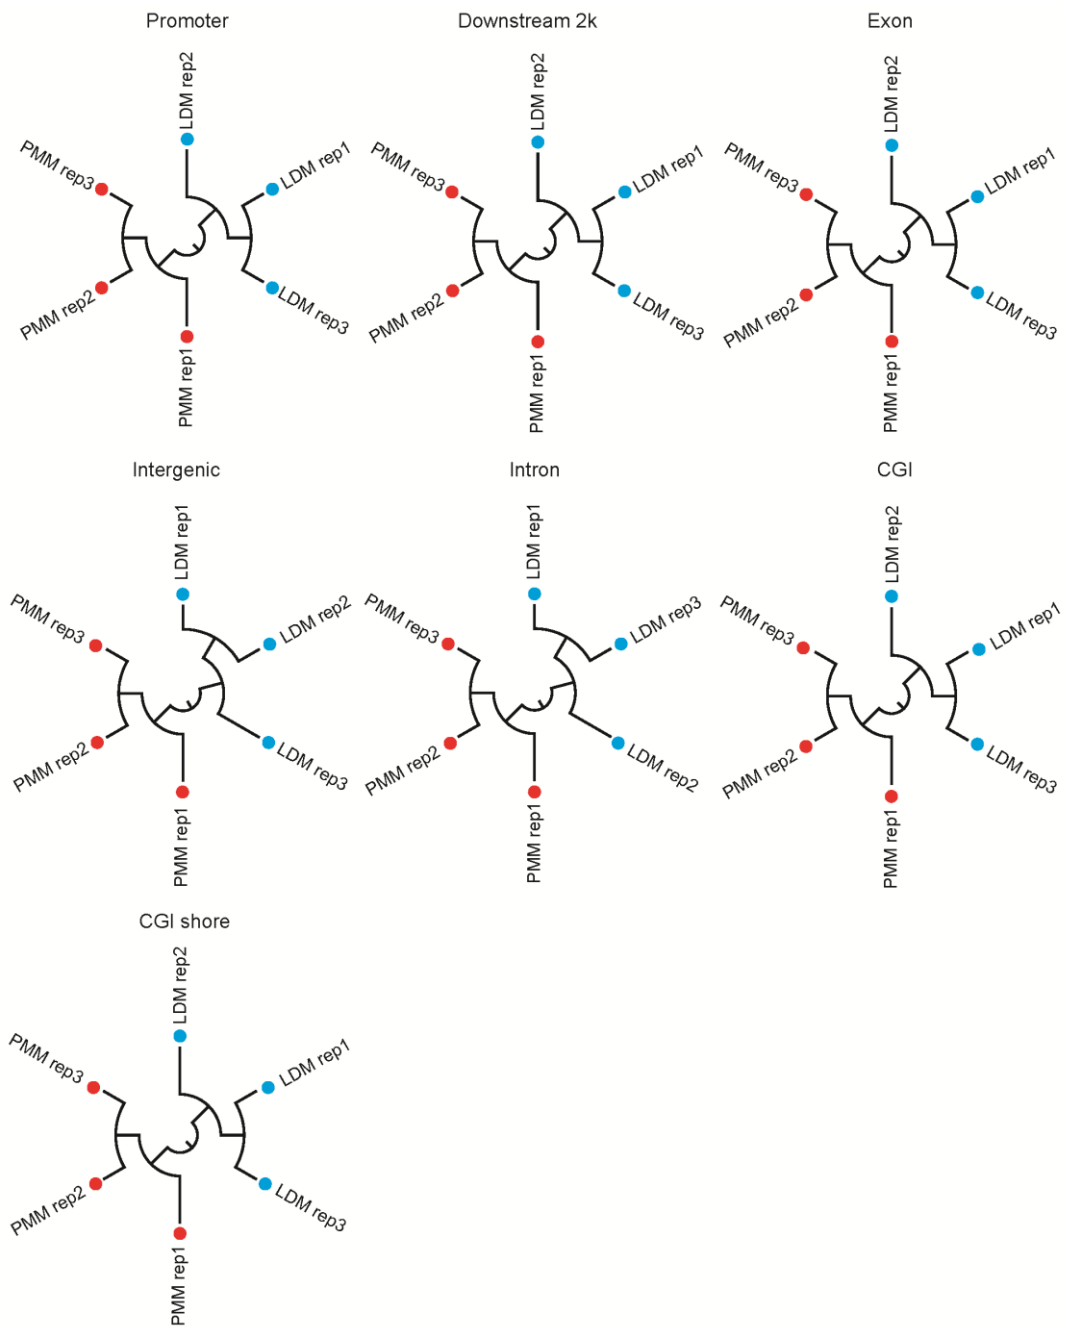

**Supplementary Figure S4. Hierarchical clustering of samples using DMRs in various genomic elements.** The distance metric applied for clustering was Pearson correlation across samples.

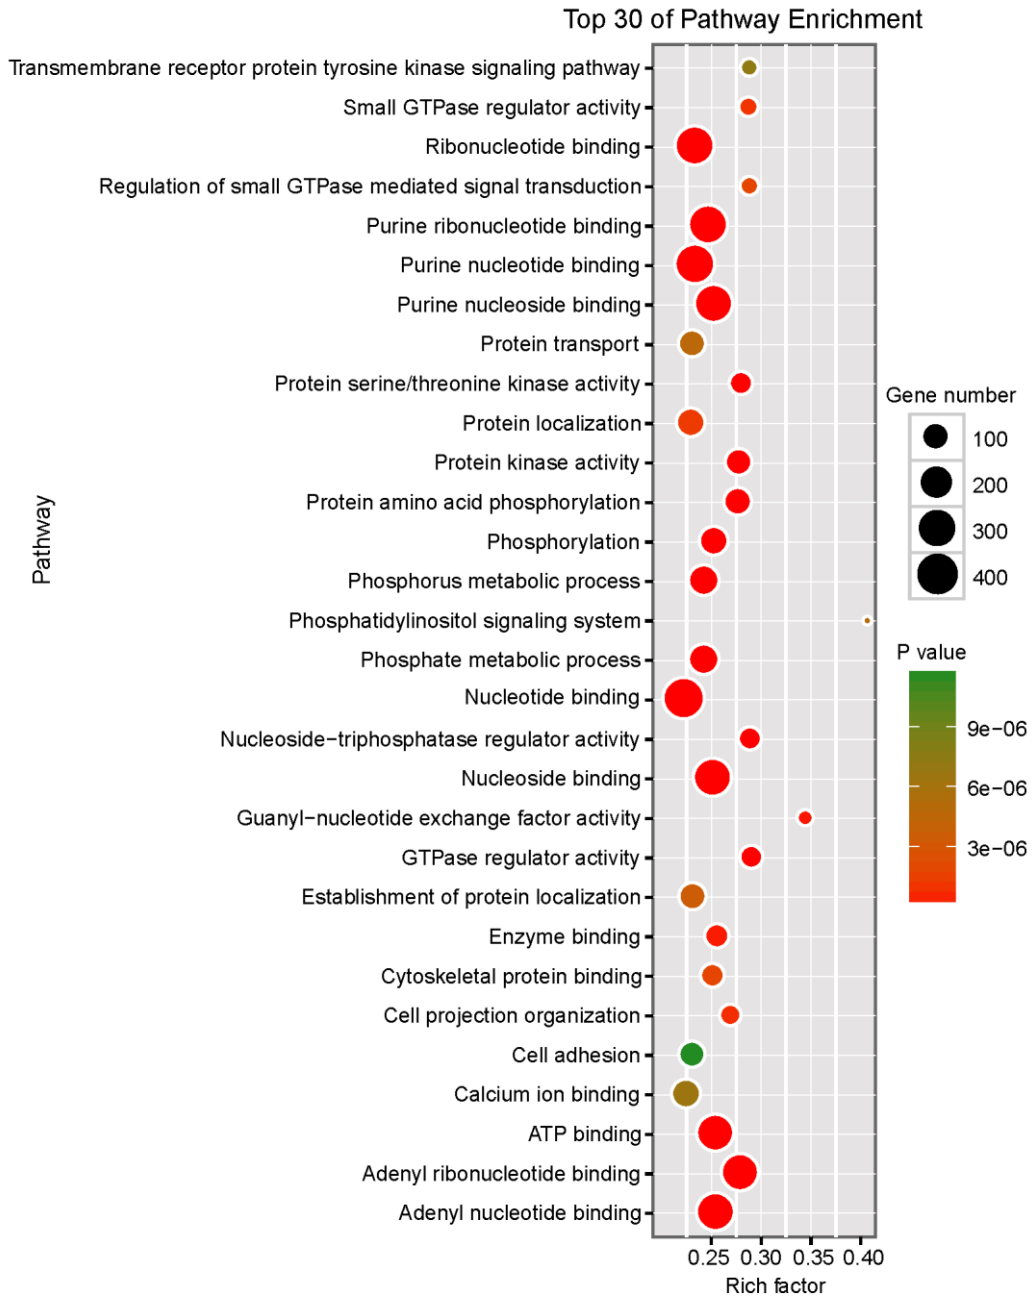

**Supplementary Figure S5. Function enrichment analysis of DMRs in gene body regions.**

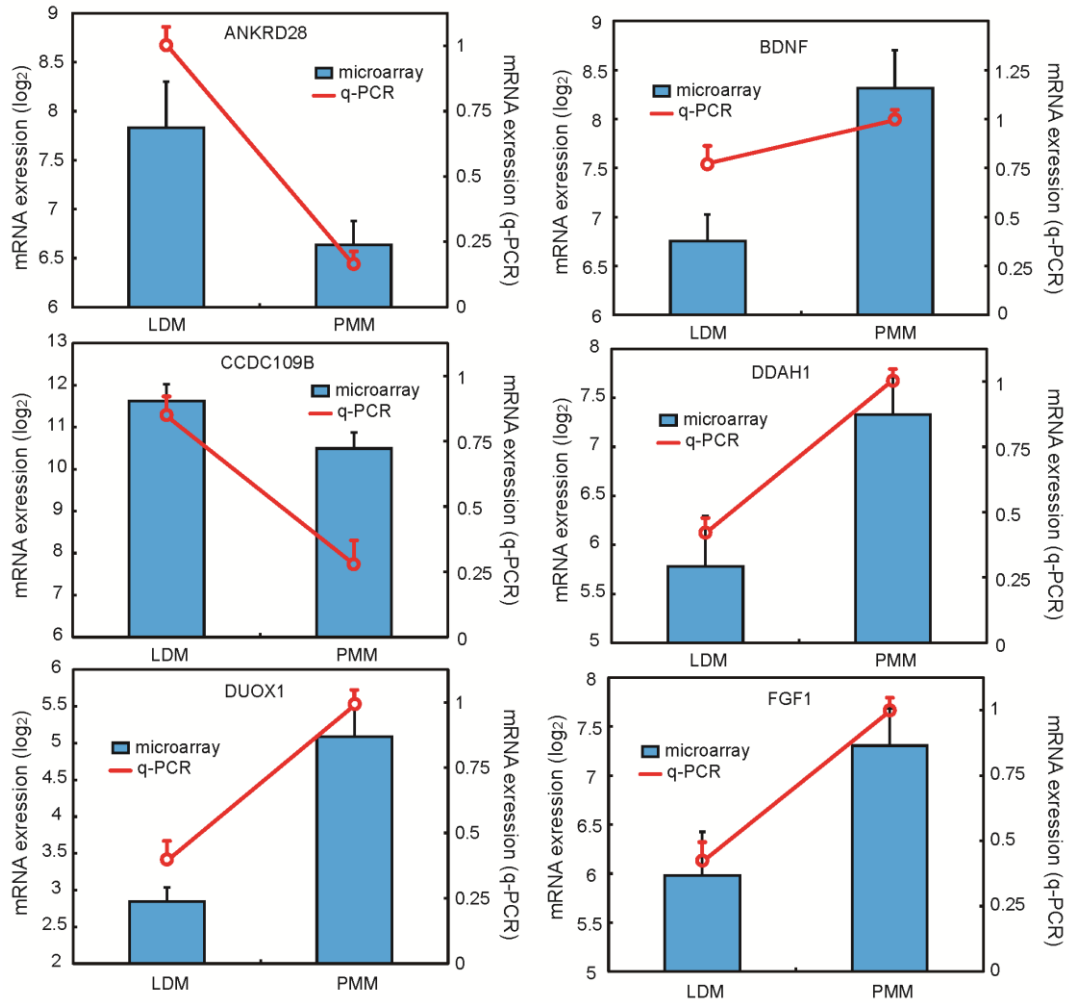

**Supplementary Figure S6. Verification of mRNA expression data by microarray using q-PCR.** The whole name of genes were shown in Table S1

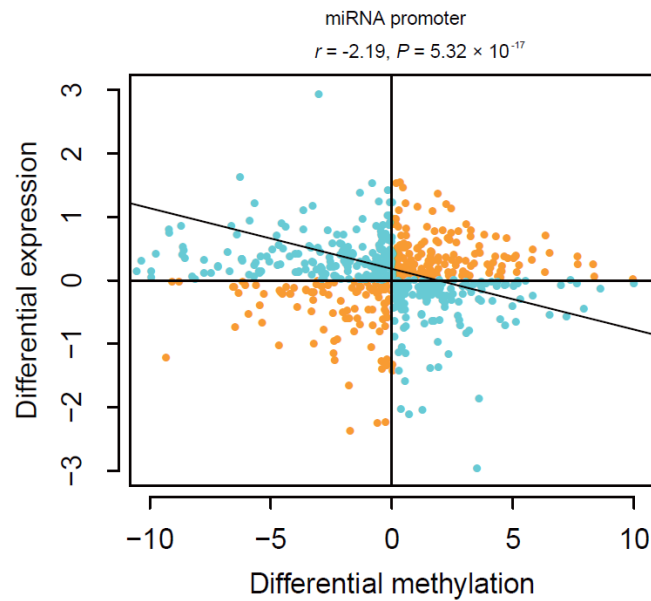

**Supplementary Figure S7. The Pearson's correlation of miRNA promoter methylation levels and miRNA expression.**

**Supplementary Table S1. Information on primers used to perform Q-PCR and BSP.**

| <b>Gene symbol</b>          | <b>Forword primer</b>                | <b>Reverse primer</b>                   |
|-----------------------------|--------------------------------------|-----------------------------------------|
| COX1                        | ACTACTGACAGACCGCAACC                 | TCCAATGGACATTATGGCTC                    |
| GCG                         | GAATCAACACCATCGGTCAAAT               | CTCCACCCATAGAATGCCAGT                   |
| SuFu                        | ATGAGGACAGCCGGAGCAT                  | TTGGCGGAAGGACAGGTTT                     |
| TUSC2                       | AGACAATCATCACCAAGAACGG               | CCTCATAGAGGATCACAGGAAA                  |
| ANKRD28                     | TTACCAGTGCCTGTTTGCT                  | TTGTATCCTTGCTTGTCCT                     |
| BDNF                        | TCTTTCTGCTGGAGGAATACA                | ACCCACTCGCTAATGCTGT                     |
| CCDC109B                    | GCCTGTCTGGGCAGTTCTA                  | TTCTGGGATGCTCTTGCTC                     |
| DDAH1                       | TTTTAAGGACTATGCGGTGTC                | ATCCAATGGCAATGAGGTT                     |
| DUOX1                       | ACCATTGGGACTCTGTGCTG                 | CATGATACTCTGGCGGTTCTG                   |
| FGF1                        | ACGGCTCACAGACACCCAG                  | GCGTTTGCAGCTTCCATTC                     |
| miR-378                     | ACUGGACUUGGAGUCAGAAGGC               | Uni-miR qPCR Primer, included in kit    |
| BSP-378                     | AAAAGGTTTGTAGGTGTAAGGG               | CCATCTCTAACTCTCAAAACTCC                 |
| Telomeric region primer (T) | CGGTTTGTGGTTTGGGTTTGGGTTTGGGTTTGGGTT | GGCTTGCCTTACCCTTACCCTTACCCTTACCCTTACCCT |
| 5S rRNA                     | GCCCGATCTCGTCTGATCT                  | AGCCTACAGCACCCGGTATT                    |
| ACTB                        | TCTGGCACCACACCTTCT                   | TGATCTGGGTCATCTTCTCAC                   |
| TBP                         | GATGGACGTTTCGGTTTAGG                 | AGCAGCACAGTACGAGCAA                     |
| TOP2B                       | AACTGGATGATGCTAATGATGCT              | TGGAAAACTCCGTATCTGTCTC                  |

Abbreviations for primers used throughout the study: COX1, cytochrome c oxidase subunit I; GCG, glucagon; SuFu, suppressor of fused homolog; TUSC2, tumor suppressor candidate 2; ANKRD28, ankyrin repeat domain 28; BDNF, brain-derived neurotrophic factor; CCDC109B, coiled-coil domain containing 109B; DDAH1, dimethylarginine dimethylaminohydrolase 1; DUOX1, dual oxidase 1; FGF1, fibroblast growth factor 1; ACTB, actin, beta; TBP, TATA-box binding protein; TOP2B, topoisomerase (DNA) II beta. Telomeric region primers used to detect the telomeric length; BSP-378 used to amplify the promoter of miR-378 for BSP reaction; 5S rRNA was used as an endogenous control for miRNA quantitative analysis. ACTB, TBP and TOP2B were used as an endogenous control for mRNA quantitative analysis.

**Supplementary Table S2. Fatty acid composition in Landrace muscle tissue (%)**

| Fatty acid (%) | PMM   | LDM   |
|----------------|-------|-------|
| C10:0          | 0.05  | 0.00  |
| C12:0          | 0.07  | 0.06  |
| C14:0          | 1.13  | 1.15  |
| C16:0          | 26.94 | 25.68 |
| C16:1          | 1.12  | 2.31  |
| C17:0          | 0.47  | 0.73  |
| C17:1          | 0.25  | 0.21  |
| C18:0          | 16.59 | 15.99 |
| C18:2n-6       | 12.89 | 6.55  |
| C18:3n-3       | 0.49  | 0.28  |
| C18:3n-6       | 0.05  | 0.00  |
| C18:n-9        | 36.14 | 43.08 |
| C20:0          | 0.33  | 0.35  |
| C20:2          | 0.60  | 0.47  |
| C20:3n-3       | 2.87  | 3.01  |
| C20:5n-3       | 0.01  | 0.03  |
| C22n-9         | 0.00  | 0.02  |
| C22:6n-3       | 0.00  | 0.07  |
| SFA            | 43.96 | 45.58 |
| MUFA           | 45.61 | 37.51 |
| PUFA           | 10.43 | 16.91 |
| P:S            | 1.03  | 0.83  |

LDM: Longissimus dorsi muscle. PMM: Psoas major muscle. SFA, MUMUFA and PUFA mean saturated, monounsaturated, and polyunsaturated fatty acid, respectively. P:S is the ratio of all PUFA to saturated fatty acid.



**Supplementary Table S3. Meat quality of Landrace muscle**

| Trait                      | LDM        |              | PMM        |             |
|----------------------------|------------|--------------|------------|-------------|
|                            | 45min      | 24h          | 45min      | 24h         |
| pH                         | 6.56±0.21  | 5.64±0.14    | 6.41±0.17  | 5.96±0.12   |
| L*                         | 41.32±2.21 | 47.87±2.91   | 35.67±3.21 | 39.23±3.47  |
| a*                         | 11.29±2.15 | 9.38±1.37    | 19.27±1.57 | 15.73±0.84  |
| b*                         | 2.89±1.29  | 4.52±1.49    | 5.15±0.90  | 6.89±1.13   |
| Shear force (kg)           | 4.67±0.55  | NA           | 2.87±0.52  | NA          |
| Lactic acid (µmol/g)       | 45.06±8.32 | 126.32±21.42 | 36.43±6.51 | 75.62±14.64 |
| Total sugar (mg glucose/g) | 18.42±5.21 | 10.63±2.43   | 10.08±3.54 | 8.06±2.15   |

All the meat quality was measured at postmortem 45min and 24h (4°C). LDM:Longissimus

dorsi muscle. PMM: Psoas major muscle. L\*, a\* and b\* represent lightness, redness and yellowness of the meat, respectively. Total sugar include the content of glycogen, glucose, and glucose-6-phosphate. All the data are presented as the mean ± standard deviation (SD).

**Supplementary Table S4. Summary of MeDIP-seq data production.**

| Tissue symbol | Biological replicate | Number of raw reads | Raw reads (Gb) | Number of clean reads | Clean reads (Gb) | Number of aligned reads | % aligned reads | Number of unique reads | % of unique reads |
|---------------|----------------------|---------------------|----------------|-----------------------|------------------|-------------------------|-----------------|------------------------|-------------------|
| <b>LDM</b>    | <b>1</b>             | 164,211,168         | 8.05           | 155,994,150           | 7.80             | 140,483,204             | 90.06%          | 110,292,107            | 78.51%            |
|               | <b>2</b>             | 154,630,448         | 7.58           | 147,049,484           | 7.35             | 132,608,309             | 90.18%          | 105,509,824            | 79.57%            |
|               | <b>3</b>             | 156,205,226         | 7.65           | 146,538,884           | 7.33             | 131,241,807             | 89.56%          | 102,059,717            | 77.76%            |
| <b>PMM</b>    | <b>1</b>             | 132,771,734         | 6.51           | 127,393,854           | 6.37             | 114,908,474             | 90.20%          | 91,473,739             | 79.61%            |
|               | <b>2</b>             | 132,486,034         | 6.49           | 126,924,070           | 6.35             | 114,200,068             | 89.98%          | 87,086,889             | 76.26%            |
|               | <b>3</b>             | 156,904,678         | 7.69           | 149,390,752           | 7.47             | 134,203,318             | 89.83%          | 106,131,142            | 79.08%            |
| <b>Total</b>  |                      | <b>897,209,288</b>  | <b>43.97</b>   | <b>853,291,194</b>    | <b>42.66</b>     | <b>767,645,180</b>      | <b>89.96%</b>   | <b>602,553,418</b>     | <b>78.49%</b>     |

The low-quality reads were filtered from the raw reads and clean reads were used in further analysis. “% aligned” is percent of clean reads aligned on the pig reference genome (version 10.2). “% unique” is percent of reads uniquely aligned over all the aligned reads. The reads with same mapping locations in each sample were taken as potentially duplicated clones created by PCR amplification during sequencing library construction, and hence were removed in the analysis.
